# Supplementary material for: Nudging Interventions on Alcohol and Tobacco Consumption in Adults: A Scoping Review of the Literature
Source: MDPI journal article supplement (doi:10.3390/ijerph20031675), 2023-01-17
Supplement: s1 [file s1]

**Table S1.** Summary general characteristics of the included studies

| <b>Author, Year, Country</b>        | <b>Nudge category</b>                                     | <b>Risk factor targeted</b> | <b>Study design</b>         | <b>Complexity of intervention</b> | <b>Mean age</b> | <b>Sample size</b> | <b>Intervention</b>                                                                                                                                                                                                                                                                                            | <b>Comparator</b>                                      |
|-------------------------------------|-----------------------------------------------------------|-----------------------------|-----------------------------|-----------------------------------|-----------------|--------------------|----------------------------------------------------------------------------------------------------------------------------------------------------------------------------------------------------------------------------------------------------------------------------------------------------------------|--------------------------------------------------------|
| Fakir MSA, 2022, Bangladesh [43]    | Increasing salience of information or incentives (IS)     | Tobacco                     | Randomized field experiment | Single component                  | 39              | 1215               | LT: recording the total smoking and SLT consumption, and its estimated monetary cost, in a pictorial logbook daily.<br>PT: placement of two graphical posters in the sleeping quarters of the participating household head and the spouse. These posters were visual reminders of the health costs of smoking. | No comparator                                          |
| Louwagie G, 2022, South Africa [44] | Increasing salience of information or incentives (IS)     | Tobacco and alcohol         | RCT                         | Multi component                   | 39              | 574                | Three brief motivational interviewing (MI) sessions, augmented with short message service (SMS) messages, targeting medication adherence, alcohol use and tobacco smoking delivered by lay health workers (LHWs).                                                                                              | Usual care                                             |
| Hasin 2022, [53]                    | DS, Providing feedback (PF)                               | Alcohol                     | RCT                         | Multi component                   | 48              | 114                | MI, HealthCall (an application that uses smartphone technology to provide brief, continued between-session) patient engagement), health education                                                                                                                                                              | MI-only vs MI plus HealthCall vs health education-only |
| Clarke 2021, [52]                   | N, Increasing salience of information or incentives (IS)  | Alcohol                     | Randomized field experiment | Single component                  | 40              | 399                | Health warning labels (HWLs) on alcohol drinks to reduce alcohol drinking                                                                                                                                                                                                                                      | No HWL intervention                                    |
| Tripp 2021 [57]                     | HL, Increasing salience of information or incentives (IS) | Tobacco                     | Cross-sectional study       | Multi component                   | 41              | 512                | In each experimental message group, participants were exposed to three messages (health, cost, and aesthetics, respectively)                                                                                                                                                                                   | No intervention                                        |
| Naudè 2021 [56]                     | GP, Increasing salience of information or incentives (IS) | Tobacco                     | Randomized field experiment | Single component                  | 36              | 622                | Experiment 1: effects of episodic future thinking (EFT) and graphic warning labels (GWL) on delay discounting.                                                                                                                                                                                                 | No intervention                                        |

|                                      |                                                       |                     |                                   |                  |    |      |                                                                                                                                                                        |                                                                                                      |  |
|--------------------------------------|-------------------------------------------------------|---------------------|-----------------------------------|------------------|----|------|------------------------------------------------------------------------------------------------------------------------------------------------------------------------|------------------------------------------------------------------------------------------------------|--|
|                                      |                                                       |                     |                                   |                  |    |      |                                                                                                                                                                        | Experiment 2: solely the effects of episodic future thinking on delay discounting and operant demand |  |
| McRobbie HJ, 2020, UK [45]           | Default choices (DF)                                  | Tobacco             | RCT                               | Multi component  | 44 | 235  | The Structured Planning and Prompting Protocol and interactive text messages                                                                                           | Usual care plus static text messages                                                                 |  |
| Langfield T, 2020, UK [46]           | Increasing salience of information or incentives (IS) | Alcohol             | Case report                       | Single component | 22 | 312  | Study 1: Use of straight-sided and outward-sloped tumblers<br>Study 2 & 3: Use of outward-sloped martini coupes                                                        | Study 1: Use of straight-sided glasses<br>Study 2 & 3: Use of straight-sided wine flutes             |  |
| Fakir MSA, 2020, Bangladesh [47]     | Providing feedback (PF)                               | Tobacco             | RCT                               | Single component | 44 | 461  | Two visual warning posters, detailing the health effects of tobacco on oneself and external actors, to be hung inside the household                                    | No comparator                                                                                        |  |
| A González-Roz, 2020, USA [54]       | Increasing salience of information or incentives (IS) | Tobacco             | Retrospective cohort study        | Multi component  | 49 | 305  | Cognitive-behavioral treatment (CBT) plus CM (Contingency management)                                                                                                  | CBT                                                                                                  |  |
| Clarke N, 2021, UK [55]              | Increasing salience of information or incentives (IS) | Alcohol             | Randomized field experiment       | Single component | 50 | 6024 | Image-and-text, text-only and image-only HWL (Health warning labels)                                                                                                   | Text-only                                                                                            |  |
| DeHart WB, 2019, USA [50]            | Providing feedback (PF)                               | Tobacco             | Randomized field experiment       | Single component | 37 | 157  | Use of cognitive biases in public health narratives                                                                                                                    | Usual care                                                                                           |  |
| Louwagie GM, 2020, South Africa [51] | Providing feedback (PF)                               | Tobacco and alcohol | Retrospective observational study | Multi component  | 40 | 45   | Motivational Interviewing (MI), a patient-centered counseling approach to address multiple behavioral problems, augmented with a Short Messaging Service (SMS) Program | No comparator                                                                                        |  |
| Martinetti MP, 2019, US [60]         | Default choices (DF)                                  | Alcohol             | Cross-sectional study             | Single component | 20 | 268  | Additional choice                                                                                                                                                      | No comparator                                                                                        |  |
| Kersbergen I, 2018, UK [48]          | Increasing salience of                                | Alcohol             | Randomized field experiment       | Single component | 30 | 278  | Use of reduced (by 25%) glasses for alcohol consumption                                                                                                                | Use of standard glasses for alcohol consumption                                                      |  |

|                           |            | information or<br>incentives (IS)                              |         |                                |                    |    |      |                                                                                                                                                                                                                                                                                                                  |                   |
|---------------------------|------------|----------------------------------------------------------------|---------|--------------------------------|--------------------|----|------|------------------------------------------------------------------------------------------------------------------------------------------------------------------------------------------------------------------------------------------------------------------------------------------------------------------|-------------------|
| Lewis<br>2018,<br>[49]    | MA,<br>USA | Increasing<br>salience of<br>information or<br>incentives (IS) | Alcohol | Randomized<br>field experiment | Single component   | 23 | 48   | 12 TMs over the next 2 weeks (2<br>messages a day, 3 days a week) on<br>the days they indicated in the<br>baseline survey as their typical<br>drinking days. Messages included<br>PBS presented in various ways<br>including testimonials, tips,<br>tailored or personalized messages,<br>and “mocktail” recipes | No comparator     |
| Hall<br>2018,<br>[58]     | MG,<br>US  | Increasing<br>salience of<br>information or<br>incentives (IS) | Tobacco | RCT                            | Single component   | 40 | 2149 | Pictorial warning                                                                                                                                                                                                                                                                                                | Text-only warning |
| Rash<br>2018,<br>[61]     | CJ,<br>USA | Increasing<br>salience of<br>information or<br>incentives (IS) | Tobacco | RCT                            | Multi<br>component | 45 | 70   | Standard care plus contingency<br>management                                                                                                                                                                                                                                                                     | Standard care     |
| Stothart<br>2016,<br>[59] | G,<br>UK   | Increasing<br>salience of<br>information or<br>incentives (IS) | Tobacco | Cross-sectional<br>study       | Single component   | 23 | 40   | Pictorial warning                                                                                                                                                                                                                                                                                                | Text-only warning |
| Brewer<br>2016,<br>[62]   | NT,<br>USA | Increasing<br>salience of<br>information or<br>incentives (IS) | Tobacco | RCT                            | Single component   | 39 | 2149 | Pictorial warning                                                                                                                                                                                                                                                                                                | Text-only warning |

Abbreviations: RCT, Randomized Controlled Trial; MI, Motivational Interviewing; CBT, Cognitive-behavioral treatment; CM Contingency Management; HWLs, Health warning labels; EFT, Episodic Future Thinking; GWL, Graphic Warning Labels.

**Table S2.** Search Strategy

| Database | Search                                                                                                                                                                                                                                                                                                                                                                        | Results |
|----------|-------------------------------------------------------------------------------------------------------------------------------------------------------------------------------------------------------------------------------------------------------------------------------------------------------------------------------------------------------------------------------|---------|
| PubMed   | (nudge* OR nudg* OR behav* econom* OR bias, cognition (MeSH) OR "behavioral intervention" OR "behavioural intervention" OR "behavioral strategy" OR "behavioural strategy") AND (alcohol* OR ethanol OR drink* OR "binge drinking" OR "Alcoholic Intoxicat*" OR Alcoholism OR addiction OR liquor* OR beer* OR wine* OR spirit* OR drunk* OR smok* OR nicotine OR anti-smok*) | 835     |

| Database | Search                                                                                                                                                                                                                                                                                                                                                                                                | Results |
|----------|-------------------------------------------------------------------------------------------------------------------------------------------------------------------------------------------------------------------------------------------------------------------------------------------------------------------------------------------------------------------------------------------------------|---------|
| Scopus   | TITLE-ABS-KEY (nudge* OR nudg* OR {behav* econom*} OR {bias, cognition} OR {behavioral intervention} OR {behavioural intervention} OR {behavioral strategy} OR {behavioural strategy}) AND TITLE-ABS-KEY(alcohol* OR ethanol OR drink* OR {binge drinking} OR {Alcoholic Intoxicat*} OR Alcoholism OR addiction OR liquor* OR beer* OR wine* OR spirit* OR drunk* OR smok* OR nicotine OR anti-smok*) | 1221    |

| Database | Search                                                                                                                                                                                                                                                                                                                                                                          | Results |
|----------|---------------------------------------------------------------------------------------------------------------------------------------------------------------------------------------------------------------------------------------------------------------------------------------------------------------------------------------------------------------------------------|---------|
| WoS      | TS=(nudge* OR nudg* OR "behav* econom*" OR "cognitive bias" OR "behavioral intervention" OR "behavioural intervention" OR "behavioral strategy" OR "behavioural strategy") AND TS=(alcohol* OR ethanol OR drink* OR "binge drinking" OR "Alcoholic Intoxicat*" OR Alcoholism OR addiction OR liquor* OR beer* OR wine* OR spirit* OR drunk* OR smok* OR nicotine OR anti-smok*) | 2536    |
